# Supplementary material for: Bilirubin Exerts Protective Effects on Alveolar Type II Pneumocytes in an In Vitro Model of Oxidative Stress
Source: MDPI journal article supplement (doi:10.3390/ijms25105323), 2024-05-13
Supplement: s1 [file Table S-1 Quantitation of cell death.pdf › Table S-1 Quantitation of cell death.pdf]

**Table S-1** Quantification of cell death (ICC of AEC II cells)

| hypoxia (5% oxygen)             |            |            |
|---------------------------------|------------|------------|
| bilirubin                       | -          | 400 nM     |
|                                 | 269.8±12.5 | 102.1±20.8 |
| Normoxia (21% O <sub>2</sub> )  |            |            |
| bilirubin                       | -          | 400 nM     |
|                                 | 100.0      | 68.6±7.9   |
| Hyperoxia (80% O <sub>2</sub> ) |            |            |
| bilirubin                       | -          | 400 nM     |
|                                 | 256.3±28.7 | 116.6±27.1 |

Data are normalized to the level of AEC II cells exposed to normoxia (100%) and are presented as mean (%) ± standard error of the mean (SEM). n = 6 individual experiments/group.
