# Supplementary material for: Bilirubin Exerts Protective Effects on Alveolar Type II Pneumocytes in an In Vitro Model of Oxidative Stress
Source: MDPI journal article supplement (doi:10.3390/ijms25105323), 2024-05-13
Supplement: s1 [file Table S-2 Quantitation of apoptosis-related mediators.pdf › Table S-2 Quantitation of apoptosis-related mediators.pdf]

**Table S-2** Quantification of apoptosis-related mediators (qPCR of AEC II cells)

| hypoxia (5% oxygen)             | 4 hours   |           | 24 hours   |            |
|---------------------------------|-----------|-----------|------------|------------|
| bilirubin                       | –         | 400 nM    | –          | 400 nM     |
| <i>Casp3</i>                    | 70.2±9.3  | 69.0±11.4 | 138.2±6.0  | 93.8±8.5   |
| <i>AIF</i>                      | 87.8±4.6  | 75.2±3.3  | 175.7±10.7 | 92.7±7.9   |
| <i>CycD2</i>                    | 93.8±6.0  | 90.8±9.0  | 109.9±7.4  | 98.1±10.6  |
| normoxia (21% O <sub>2</sub> )  | 4 hours   |           | 24 hours   |            |
| bilirubin                       | –         | 400 nM    | –          | 400 nM     |
| <i>Casp3</i>                    | 100.0±2.1 | 82.2±7.7  | 100.0±6.6  | 102.7±12.5 |
| <i>AIF</i>                      | 100.0±4.7 | 91.9±7.0  | 100.0±8.0  | 96.2±8.8   |
| <i>CycD2</i>                    | 100.0±8.1 | 92.8±8.0  | 100.0±6.5  | 99.2±7.9   |
| hyperoxia (80% O <sub>2</sub> ) | 4 hours   |           | 24 hours   |            |
| bilirubin                       | –         | 400 nM    | –          | 400 nM     |
| <i>Casp3</i>                    | 62.9±6.4  | 65.8±9.2  | 140.3±7.1  | 84.9±10.4  |
| <i>AIF</i>                      | 89.4±8.1  | 68.1±7.3  | 156.1±6.8  | 87.7±6.6   |
| <i>CycD2</i>                    | 91.1±8.0  | 93.9±6.7  | 63.4±4.0   | 183.3±12.9 |

Data are normalized to the level of AEC II cells exposed to normoxia (100%) and are presented as mean (%) ± standard error of the mean (SEM). n = 5 individual experiments/group.
