# Supplementary material for: Bilirubin Exerts Protective Effects on Alveolar Type II Pneumocytes in an In Vitro Model of Oxidative Stress
Source: MDPI journal article supplement (doi:10.3390/ijms25105323), 2024-05-13
Supplement: s1 [file Table S-3 Quantitation of oxidative stress-related mediators.pdf › Table S-3 Quantitation of oxidative stress-related mediators.pdf]

**Table S-3** Quantification of oxidative stress-related mediators (qPCR of AEC II cells)

| hypoxia (5% oxygen)             | 4 hours   |           | 24 hours    |            |
|---------------------------------|-----------|-----------|-------------|------------|
| bilirubin                       | –         | 400 nM    | –           | 400 nM     |
| <i>Nrf2</i>                     | 109.3±7.0 | 85.4±6.6  | 152.6±15.6  | 105.1±8.8  |
| <i>Keap1</i>                    | 69.5±2.9  | 76.0±5.6  | 89.5±8.7    | 261.3±15.8 |
| <i>GCLC</i>                     | 93.0±3.0  | 78.6±3.9  | 150.3±8.8   | 102.9±30.1 |
| <i>Hif1α</i>                    | 134.8±5.3 | 85.9±4.9  | 168.3±10.5  | 117.9±2.1  |
| normoxia (21% O <sub>2</sub> )  | 4 hours   |           | 24 hours    |            |
| bilirubin                       | –         | 400 nM    | –           | 400 nM     |
| <i>Nrf2</i>                     | 100.0±6.6 | 83.1±5.5  | 100.0±9.2   | 97.1±11.9  |
| <i>Keap1</i>                    | 100.0±7.6 | 80.8±4.4  | 100.0±12.0  | 103.5±8.0  |
| <i>GCLC</i>                     | 100.0±6.6 | 78.1±10.0 | 100.0±13.4  | 90.9±14.7  |
| <i>Hif1α</i>                    | 100.0±6.3 | 93.9±5.3  | 100.0±12.2  | 94.7±11.8  |
| hyperoxia (80% O <sub>2</sub> ) | 4 hours   |           | 24 hours    |            |
| bilirubin                       | –         | 400 nM    | –           | 400 nM     |
| <i>Nrf2</i>                     | 90.9±3.9  | 81.8±2.1  | 181.8±11.11 | 118.0±9.0  |
| <i>Keap1</i>                    | 64.5±6.0  | 71.6±3.1  | 69.3±4.2    | 128.3±3.7  |
| <i>GCLC</i>                     | 124.5±2.0 | 79.5±4.6  | 138.7±5.6   | 85.8±4.9   |
| <i>Hif1α</i>                    | 95.0±5.3  | 92.4±5.0  | 107.7±4.5   | 104.3±10.1 |

Data are normalized to the level of AEC II cells exposed to normoxia (100%) and are presented as mean (%) ± standard error of the mean (SEM). n = 5 individual experiments/group.
