# Supplementary material for: Bilirubin Exerts Protective Effects on Alveolar Type II Pneumocytes in an In Vitro Model of Oxidative Stress
Source: MDPI journal article supplement (doi:10.3390/ijms25105323), 2024-05-13
Supplement: s1 [file Table S-4 Quantitation of inflammation-related mediators.pdf › Table S-4 Quantitation of inflammation-related mediators.pdf]

**Table S-3** Quantification of inflammation-related mediators (qPCR of AEC II cells)

| hypoxia (5% oxygen)             | 4 hours   |          | 24 hours   |            |
|---------------------------------|-----------|----------|------------|------------|
| bilirubin                       | –         | 400 nM   | –          | 400 nM     |
| <i>NFκB1</i>                    | 100.9±8.7 | 82.5±4.8 | 191.7±6.4  | 122.4±14.9 |
| <i>NFκB2</i>                    | 102.7±9.9 | 91.4±9.8 | 167.0±10.9 | 155.4±9.1  |
| <i>TNFα</i>                     | n.d.      | n.d.     | 190.8±20.4 | 88.4±15.6  |
| <i>TGFβ</i>                     | 94.4±11.6 | 74.1±6.5 | 194.5±14.9 | 123.8±16.6 |
| normoxia (21% O <sub>2</sub> )  | 4 hours   |          | 24 hours   |            |
| bilirubin                       | –         | 400 nM   | –          | 400 nM     |
| <i>NFκB1</i>                    | 100.0±5.1 | 94.2±9.7 | 100.0±11.7 | 87.7±7.6   |
| <i>NFκB2</i>                    | 100.0±4.7 | 89.4±4.3 | 100.0±9.2  | 92.6±1.8   |
| <i>TNFα</i>                     | n.d.      | n.d.     | 100.0±11.5 | 108.5±13.0 |
| <i>TGFβ</i>                     | 100.0±8.5 | 77.6±6.7 | 100.0±9.5  | 82.9±11.8  |
| hyperoxia (80% O <sub>2</sub> ) | 4 hours   |          | 24 hours   |            |
| bilirubin                       | –         | 400 nM   | –          | 400 nM     |
| <i>NFκB1</i>                    | 91.2±7.6  | 79.4±7.3 | 108.6±7.4  | 89.7±7.9   |
| <i>NFκB2</i>                    | 91.2±5.9  | 72.8±4.0 | 134.7±2.9  | 102.6±7.5  |
| <i>TNFα</i>                     | n.d.      | n.d.     | 144.7±4.9  | 84.6±14.1  |
| <i>TGFβ</i>                     | 89.3±5.7  | 57.2±6.3 | 104.2±8.9  | 94.1±16.3  |

Data are normalized to the level of AEC II cells exposed to normoxia (100%) and are presented as mean (%) ± standard error of the mean (SEM). n = 5 individual experiments/group (n.d. means “not detectable”).
